# Supplementary material
Source: Royal Society of Chemistry journal article supplement (doi:10.1039/d5nr02175h)

# Supplementary Bridge Information (SI) for Nanoscale.

This journal is © The Royal Society of Chemistry 2026

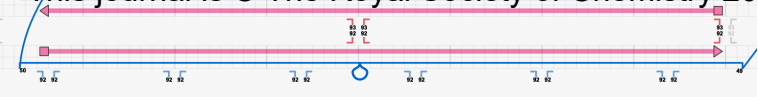

## Bridge w/ Crossovers - 128 bp Example

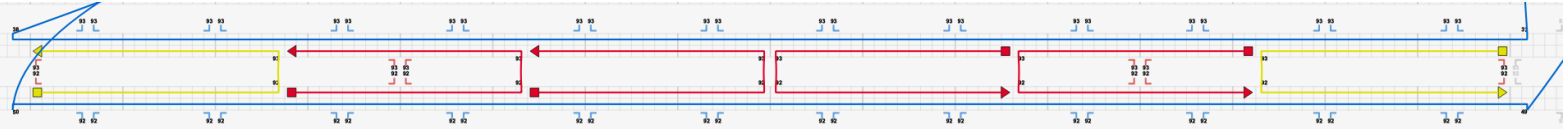

Supplement: d5nr02175h3.pdf [file d5nr02175h3.pdf]
