# Supplementary material
Source: Royal Society of Chemistry journal article supplement (doi:10.1039/d5nr02175h)
Supplement: d5nr02175h7.pdf [file d5nr02175h7.pdf]

Post-Molecular  
Sketch (30 min)  
Running Simulation

Click me for instructions  
[ESC] ← [MS] → [ESC] ←

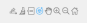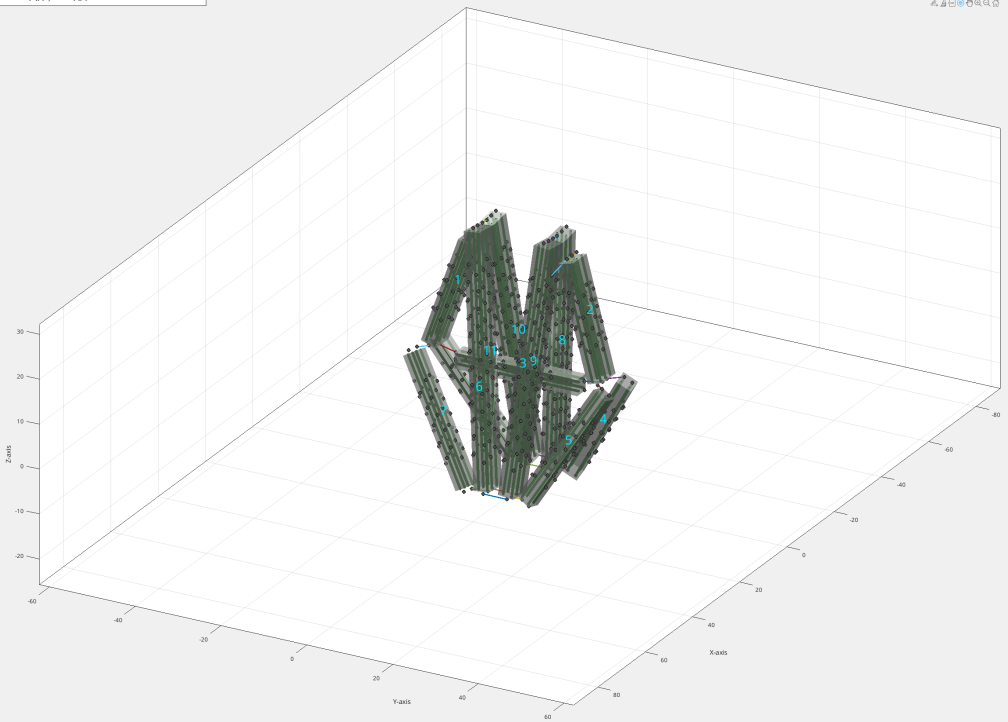

Bundle manipulation

Bundle (bundle) (bundle)

Unit: nm

1

Trans. / Rotate

Axis auto/equal

Global / Local

Connectivity

Graph

$i, j \#$   
 $C_{ij}$

$i, j \#$   
 $C_{ij} \neq 0$

Connect bundles

Edit ssDNA

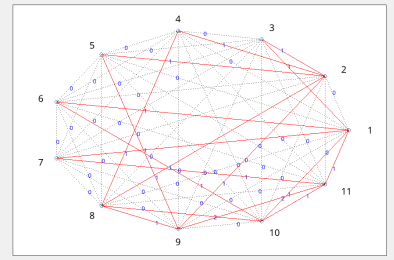

Query and assign individual connection

Bundle1 Bundle1

# of Connections =

Left = Add

Right = cancel

Modify components and Save/Load mechanism

Add/Remove

Edit Bundle

Save

Load
