# Supplementary material
Source: Royal Society of Chemistry journal article supplement (doi:10.1039/d5nr02175h)

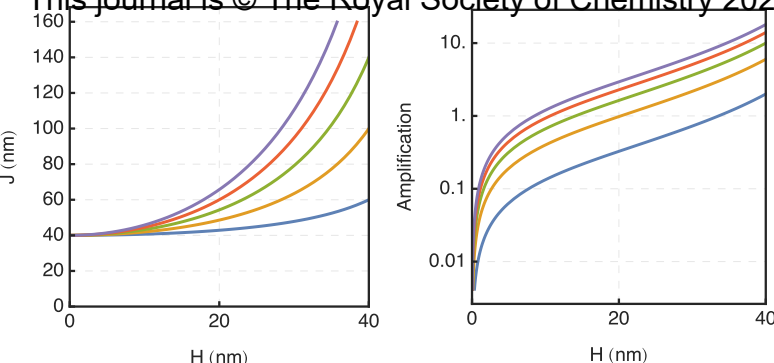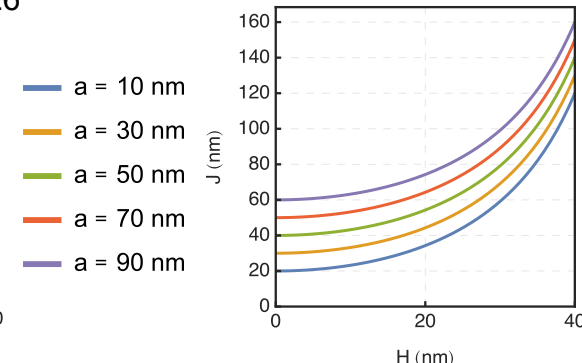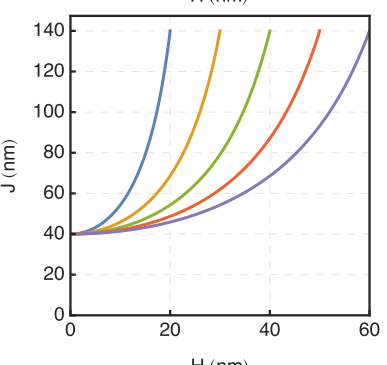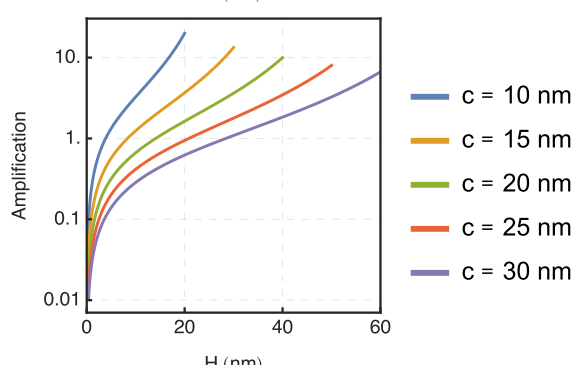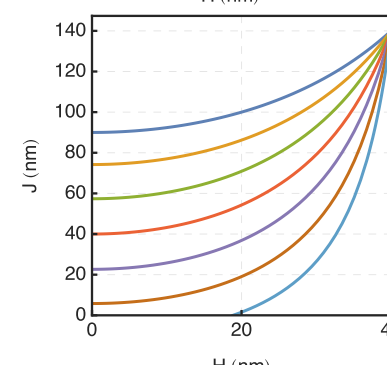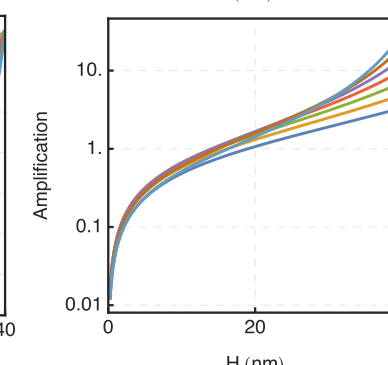

### Wireframe Design

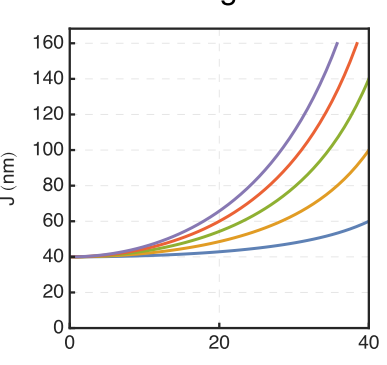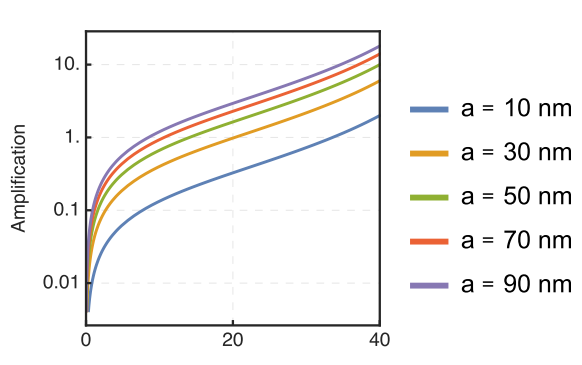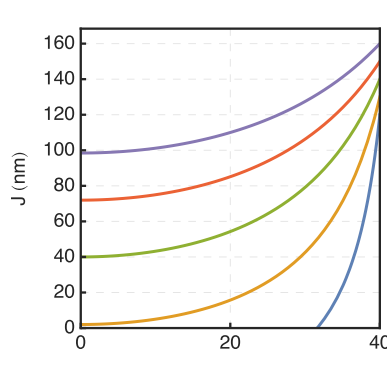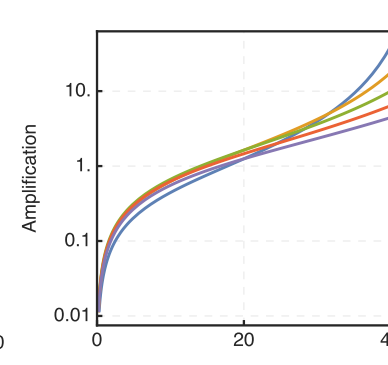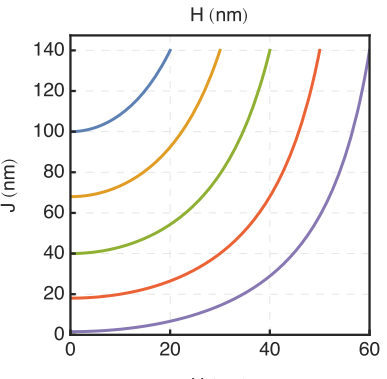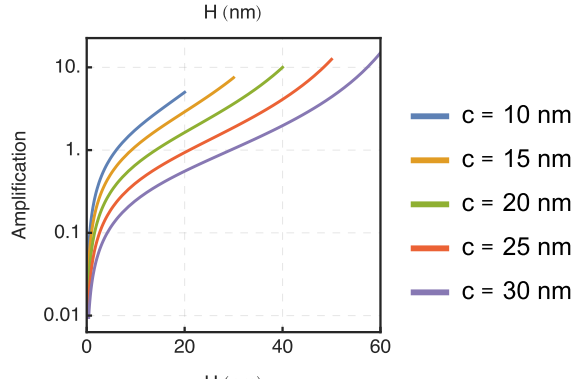

Supplement: d5nr02175h10.pdf [file d5nr02175h10.pdf]

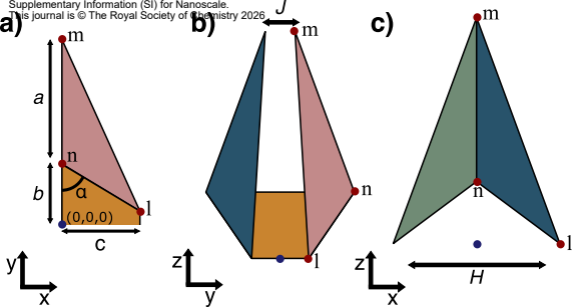

Supplement: d5nr02175h5.pdf [file d5nr02175h5.pdf]

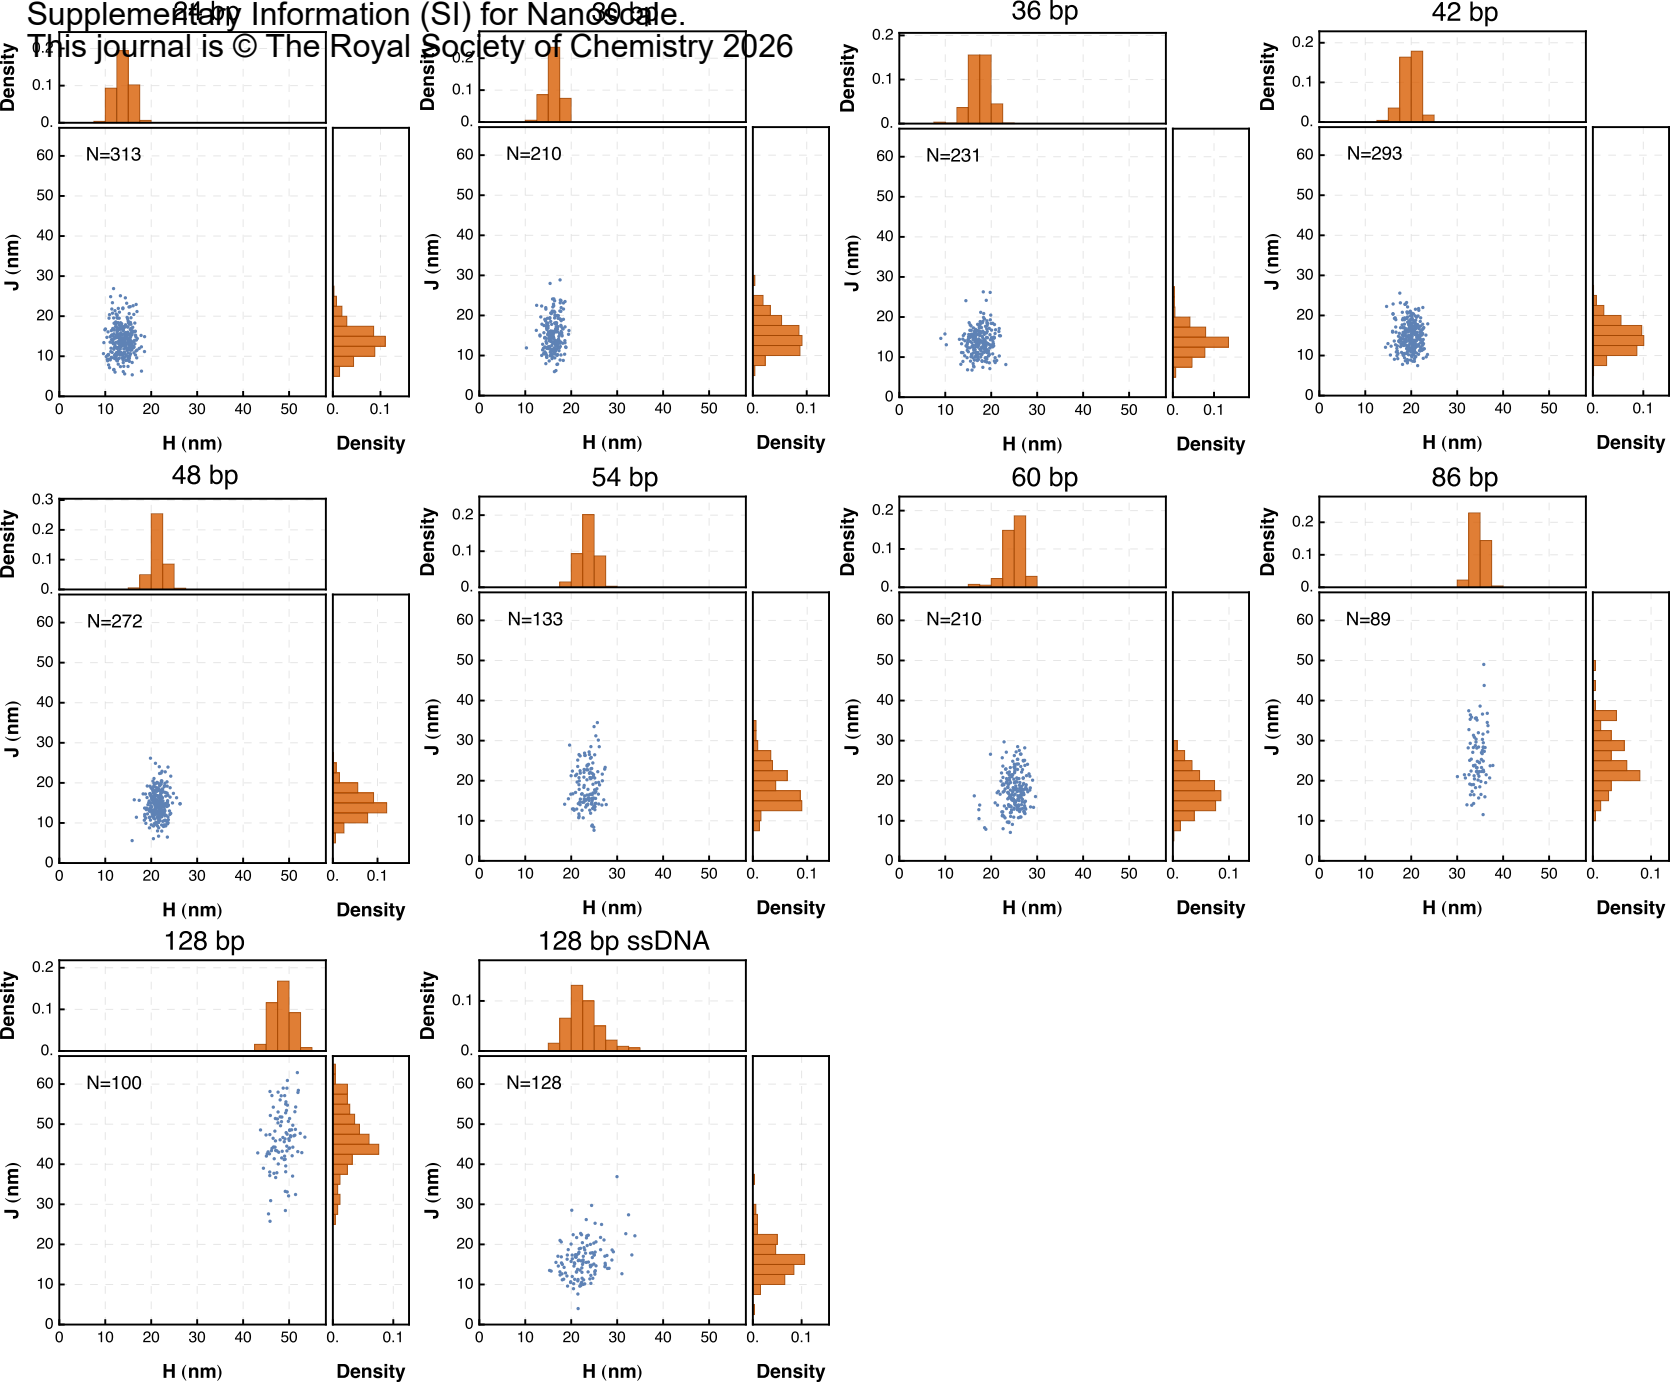

Supplement: d5nr02175h6.pdf [file d5nr02175h6.pdf]

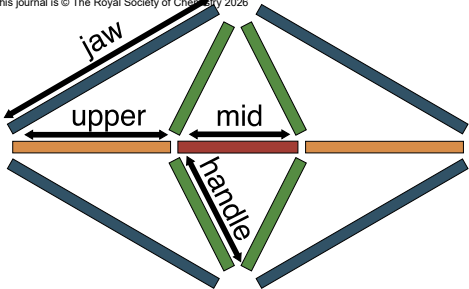

Supplement: d5nr02175h9.pdf [file d5nr02175h9.pdf]
